# Supplementary material for: Selective hydrogenation of nitriles to primary amines catalyzed by a novel iron complex
Source: Royal Society of Chemistry journal article supplement (doi:10.1039/c5cc08204h), 2015-12-15
Supplement: c5cc08204h1.pdf [file c5cc08204h1.pdf]

# Supporting Information

## Selective Hydrogenation of Nitriles to Primary Amines Catalyzed by a Novel Iron Complex

Subrata Chakraborty, Gregory Leitus, and David Milstein\*

Department of Organic Chemistry, Weizmann Institute of Science, Rehovot, 76100,  
Israel

### Table of Contents:

|                                                                   |    |
|-------------------------------------------------------------------|----|
| 1) General procedure.....                                         | 2  |
| 2) Experimental Procedure.....                                    | 2  |
| a) Synthesis and characterization of Ligand <b>1</b> .....        | 2  |
| b) Preparation of Fe(PNP)Br <sub>2</sub> complex( <b>2</b> )..... | 3  |
| c) General Procedure for the nitrile hydrogenation.....           | 4  |
| 3) X-ray structure determination data.....                        | 5  |
| 4) GC-MS data of various substrate and hydrogenated products....  | 7  |
| 5) NMR spectra of ligand <b>1</b> .....                           | 10 |

## General Procedure:

All experiments with metal complexes and phosphine ligands were carried out under an atmosphere of purified nitrogen in a Vacuum Atmospheres glovebox equipped with a MO 40-2 inert gas purifier or using standard Schlenk techniques under argon atmosphere. All solvents were reagent grade or better. Non-deuterated solvents were dried over sodium/benzophenoneketyl (tetrahydrofuran, n-pentane, 1,4-dioxane, diethylether and toluene), magnesium (MeOH, EtOH and isopropanol) and distilled under argon atmosphere. MeCN was purchased from Sigma Aldrich and was degassed and stored in the glove box. All solvents were degassed with argon and kept in the glove box over activated 4Å molecular sieves. Deuterated solvents were purchased from Aldrich, purged with argon and stored over activated 4Å molecular sieves in the glove box.  $^1\text{H}$ ,  $^{13}\text{C}$  and  $^{31}\text{P}$  NMR spectra were recorded using Bruker AMX-300 and AMX-400 NMR spectrometers. All spectra were recorded at 295 K, unless otherwise noted.  $^1\text{H}$  NMR and  $^{13}\text{C}\{\text{H}\}$  NMR chemical shifts are reported in ppm downfield from tetramethylsilane and referenced to the residual signals of an appropriate deuterated solvent.  $^{31}\text{P}\{\text{H}\}$  NMR chemical shifts are reported in ppm downfield from  $\text{H}_3\text{PO}_4$  and referenced to an external 85% solution of phosphoric acid in  $\text{D}_2\text{O}$ . NMR spectroscopy abbreviations: br, broad; s, singlet; d, doublet; m, multiplet. GCMS was carried out on HP 6890 (flame ionization detector and thermal conductivity detector) and HP 5973 (MS detector) instruments equipped with a 30 m column (Restek 5MS, 0.32 mm internal diameter) with a 5% phenylmethylsilicone coating (0.25 mm) and helium as carrier gas. Most of the commercially available reagents were used as received. Benzonitrile was dried and purified by distillation. Selected substrates (4-methylbenzonitrile, 3-methylbenzonitrile, 4-fluorobenzonitrile) were purified either by distillation or crystallization. All the products of the catalytic experiments are commercially available and were identified by comparison of the  $^1\text{H}$  NMR spectra or by GC-MS spectra with those of the commercially available compounds. Elemental analyses were performed on a Thermo Finnigan Italia S.p.A-FlashEA 1112 CHN Elemental Analyzer.

## Experimental:

### Synthesis of Bis(2-diisopropylphosphinobenzyl)amine (1):

In an oven-dried Schlenk flask *n*BuLi (1.3g, 20.3 mmol, 3 equiv, 1.6 M in hexane) was added dropwise to a solution of bis(2-bromobenzyl)amine (2.4g, 6.7 mmol) in diethyl ether (90 mL) at -50 °C under an argon atmosphere. The reaction solution turned pink and was allowed to warm up to room temperature and stirred for 16 h, providing a red solution. The reaction mixture was again cooled to -50 °C and diisopropylchlorophosphine (3.1g, 20.2 mmol) was added dropwise while stirring for half an hour. The reaction mixture was stirred at room temperature for 12 h. Monitoring the reaction mixture at this point by  $^{31}\text{P}\{^1\text{H}\}$  NMR showed two singlet signals at -5.4 and 85.4 ppm in a 2:1 ratio. Then the solvents and volatiles were removed in *vacuo* and 80 ml of dry toluene and 20 mL of degassed water were added to the sticky solid residue and the mixture was refluxed overnight under an argon atmosphere. The  $^{31}\text{P}\{^1\text{H}\}$  NMR of an aliquot in toluene showed a sharp signal at -4.4 ppm, corresponding to the desired ligand **1**, and an aliquot in water showed a signal at 67.8 ppm corresponding to oxidized diisopropylphosphineoxide. The toluene portion was separated from the aqueous solution, dried over MgSO<sub>4</sub> and evaporated to dryness under reduced pressure to obtain a red viscous liquid (99% purity by  $^{31}\text{P}$  NMR) which can be used without further purifications for complex synthesis. Yield: 2.1 g (74%).

$^1\text{H}$  NMR (CDCl<sub>3</sub>, 400 MHz):  $\delta$  = 0.90 (dd, 12H, CH<sub>3</sub>), 1.12 (dd, 12H, CH<sub>3</sub>), 2.11 (m, 4H, CH), 2.35 (s, NH), 4.15 (d,  $J$  = 2 Hz, 2H, CH<sub>2</sub>), 7.22 (td, 2H, Ar), 7.30 (td, 2H, Ar), 7.43 (m, 2H, Ar), 7.49 (m, 2H, Ar).  $^{13}\text{C}$ -NMR (CDCl<sub>3</sub>, 101 MHz):  $\delta$  = 19.5 (d,  $J_{\text{CP}}$  = 10.6 Hz, CH<sub>3</sub>), 20.2 (d,  $J_{\text{CP}}$  = 18.8 Hz, CH<sub>3</sub>), 24.1 (d,  $J_{\text{CP}}$  = 12.3 Hz, CH), 52.1 (d,  $J_{\text{CP}}$  = 23.7 Hz, CH<sub>2</sub>), 126.2 (s, Ar), 128.7 (s, Ar), 129.03 (d,  $J_{\text{CP}}$  = 6.1 Hz, Ar), 132.3 (d,  $J_{\text{CP}}$  = 3.1 Hz, Ar), 134.2 (d,  $J_{\text{CP}}$  = 20.1 Hz, Ar), 147 (d,  $J_{\text{CP}}$  = 24.1 Hz, Ar).  $^{31}\text{P}\{^1\text{H}\}$  NMR (CDCl<sub>3</sub>, 121 MHz):  $\delta$  = -4.6 (s).

### Preparation of Fe(1)Br<sub>2</sub> complex (2):

To a suspension of FeBr<sub>2</sub> (140 mg, 0.65 mmol) in 15 mL THF was added one equiv. of ligand **1** (280 mg, 0.65 mmol) under N<sub>2</sub> atmosphere and the reaction mixture was stirred at room temperature overnight. The obtained light green solution was filtered through

celite and the solvent was removed in *vacuo*. The residue was washed twice with pentane (2x10 mL) and dried. Afterwards the product was extracted with acetonitrile and washed with pentane to afford **2** (252 mg) in 60% yield as a light green product. Crystals suitable for X-ray analysis were obtained by slow diffusion of pentane into a concentrated toluene solution of **2**. Anal. Calcd. for C<sub>26</sub>H<sub>41</sub>Br<sub>2</sub>FeNP<sub>2</sub>: C, 48.40; H, 6.41; N, 2.17. Found: C, 48.98; H, 5.99; N, 2.20; IR (thin film, NaCl) = 3387 cm<sup>-1</sup>(ν<sub>N-H</sub>); ESI-MS: m/z: 446.46 [monooxidised iPrPNP + H]<sup>+</sup> = [C<sub>26</sub>H<sub>41</sub>NOP<sub>2</sub>H]<sup>+</sup>.

#### **Reaction of complex (2) with 1 equiv. KHMDS under CO:**

A solution of **2** (30 mg, 0.046 mmol) in 0.5 mL THF was taken in a J Young NMR tube in glovebox. The tube was taken out from the glove box and the N<sub>2</sub> atmosphere was removed by a *freeze pump thaw* cycle. The tube was pressurised with 1 atm of CO. Then 1 equiv. KHMDS (9.2 mg) was added under CO atmosphere and the reaction mixture was kept at room temperature for 24 hours. Monitoring the reaction solution by <sup>31</sup>P{<sup>1</sup>H} NMR showing the appearance of two doublet signals at 63 and 71 ppm (<sup>2</sup>J<sub>PP</sub> = 90 Hz) along with a signal of free PNP ligand, indicating the formation of a diamagnetic complex of the type Fe(PNP)(CO)<sub>2</sub>Br with the coordination of both phosphorus atoms in a *cis* arrangement. <sup>31</sup>P{<sup>1</sup>H} NMR (THF, 121 MHz): δ = 63 ppm (d, <sup>2</sup>J<sub>PP</sub> = 90 Hz), 71 ppm (d, <sup>2</sup>J<sub>PP</sub> = 90 Hz). IR (NaCl): 2009 cm<sup>-1</sup> (ν<sub>CO</sub>), 1959 cm<sup>-1</sup> (ν<sub>CO</sub>).

#### **General procedure for nitrile hydrogenation:**

**For Table 1:** 0.01 mmol of pre-catalyst **2** was dissolved in 2 mL THF and a solution of 0.01 mmol of NaHBET<sub>3</sub> (1 M in THF) in 1 mL THF (according to Table 1) was added dropwise at room temperature while stirring. After stirring the reaction mixture for 20 min, the solvent was evaporated under vacuum. Then the specified amount of base (see Table 1) and 1 mmol of benzonitrile were added to the residue and the mixture was dissolved in 2 mL of THF and placed in a high pressure autoclave. The autoclave was pressurized with H<sub>2</sub> (see Table 1) and heated at 140 °C (bath temperature) with stirring for the specified time. The reaction mixture was then cooled down in an ice bath and H<sub>2</sub> was vented off. The reaction products were analyzed by GC-MS using m-xylene as internal standard.

**For Table 2 (entries 1,2,4,5,13,14 and 20):** 0.01 mmol of pre-catalyst **2**, 0.01 mmol of NaHBET<sub>3</sub> (1 M in THF), 0.03 mmol KHMDS and 1 mmol substrate were used, employing the same procedure as described above. Product yields were determined by either GC-MS or <sup>1</sup>H NMR using m-xylene or toluene internal standard.

**For Table 2 (entries 3,11 and 15):** 0.02 mmol of pre-catalyst **2**, dissolved in 2 mL THF and a solution of 0.02 mmol of NaHBET<sub>3</sub> (1 M in THF) in 1 mL THF was added dropwise at room temperature while stirring. After stirring the reaction mixture for 20 min, the solvent was evaporated under vacuum for 2 h. Then 0.06 mmol of KHMDS and 1 mmol of substrate were added to the residue and the mixture was dissolved in 2 mL of THF and placed in a high pressure autoclave. The autoclave was take out of the glove box and pressurized with 60 bar H<sub>2</sub> and heated at 140 °C (bath temperature) with stirring for the specified time. The reaction mixture was then cooled in an ice bath and H<sub>2</sub> was vented off. Product yields were determined by either GC-MS or <sup>1</sup>H NMR using m-xylene or toluene internal standard.

**For Table 2 (entries 6-10, 12, 16-19):** To a solution of 0.02 mmol of pre-catalyst **2**, in 2 mL THF was added 0.02 mmol of NaHBET<sub>3</sub> (1 M in THF) in 1 mL THF dropwise at room temperature while stirring. The reaction mixture was kept for 20 min. The solvent was evaporated under vacuum and the residue was kept for drying for 2 h. Then 0.06 mmol of KHMDS and 0.4 mmol of substrate were added to the residue. The mixture was dissolved in 2 mL of THF (for entry 18; 2 mL toluene was used) and placed in a high pressure autoclave. The autoclave was take out from the glove box and pressurized with 60 bar H<sub>2</sub> and heated at 140 °C (bath temperature) with stirring for the specified time. The reaction mixture was then cooled in an ice bath and H<sub>2</sub> was vented off. Product yields were determined by either GC-MS or <sup>1</sup>H NMR using m-xylene or toluene internal standard.

#### **X-ray Crystal structure determination:**

Crystal data were measured at 100 K on a Bruker Apex-II Kappa CCD diffractometer equipped with [ $\lambda(\text{Mo-K}\alpha) = 0.71073 \text{ \AA}$ ] radiation, graphite monochromator and Mira Col optics. The data were processed with APEX-II collect package programs. Structures were

solved by the AUTOSTRUCTURE module and refined with full-matrix least-squares refinement based on F2 with SHELXL-97. Full details can be found in the CIF files and Table S1.

**Table S1:** Crystal data summary of **2**.

|                                                  |                                                                     |
|--------------------------------------------------|---------------------------------------------------------------------|
|                                                  | <b>2</b>                                                            |
| CCDC                                             | 1419077                                                             |
| empirical formula                                | C <sub>26</sub> H <sub>41</sub> Br <sub>2</sub> Fe N P <sub>2</sub> |
| formula weight (g·mol <sup>-1</sup> )            | 645.21                                                              |
| temperature (K)                                  | 100(2)                                                              |
| wavelength (Å)                                   | 0.71073                                                             |
| crystal system, space group                      | Orthorhombic, P2(1)2(1)2(1)                                         |
| <i>a</i> (Å)                                     | 12.014(2)                                                           |
| <i>b</i> (Å)                                     | 15.518(3)                                                           |
| <i>c</i> (Å)                                     | 15.750(2)                                                           |
| $\alpha$ (deg)                                   | 90.00                                                               |
| $\beta$ (deg)                                    | 90.00                                                               |
| $\gamma$ (deg)                                   | 90.00                                                               |
| volume (Å <sup>3</sup> )                         | 2936.5(8)                                                           |
| <i>Z</i> , density (calcd) (Mg·m <sup>-3</sup> ) | 4, 1.459                                                            |
| abs coefficient (mm <sup>-1</sup> )              | 3.358                                                               |
| <i>F</i> (000)                                   | 1320                                                                |
| crystal size (mm <sup>3</sup> )                  | 0.12 x 0.10 x 0.06                                                  |
| $\theta$ range (deg) for data collection         | 2.59 to 26.37                                                       |
| reflections collected                            | 20482                                                               |
| reflections unique                               | 5954/ <i>R</i> <sub>int</sub> = 0.0461                              |
| completeness to $\theta$ (%)                     | 99.7                                                                |

|                                                           |                                 |
|-----------------------------------------------------------|---------------------------------|
| absorption correction                                     | Semi-empirical from equivalents |
| max/min transmission                                      | 0.8239 and 0.6887               |
| data / restraints / parameters                            | 5954 / 0/ 301                   |
| goodness-of-fit on $F^2$                                  | 1.036                           |
| final $R_1$ and $wR_2$ indices [ $I > 2\sigma(I)$ ]       | 0.0333, 0.0767                  |
| $R_1$ and $wR_2$ indices (all data)                       | 0.0435, 0.0814                  |
| largest diff. peak and hole ( $e \cdot \text{\AA}^{-3}$ ) | 1.254 and -0.435                |

**Table S2:** Selected bond lengths and bond angles of **2**.

| Bond lengths [Å] |            | Bond Angles [°] |           |
|------------------|------------|-----------------|-----------|
| Br1-Fe1          | 2.3794(7)  | N1-Fe1-Br1      | 106.16(9) |
| Br2-Fe1          | 2.3811(7)  | N1-Fe1-Br2      | 105.26(9) |
| Fe1-N1           | 2.118(3)   | Br1-Fe1-Br2     | 118.71(3) |
| Fe1-P1           | 2.4282(11) | N1-Fe1-P1       | 89.96(8)  |
| N1-H1            | 0.88(4)    | Br1-Fe1-P1      | 119.41(3) |
|                  |            | Br2-Fe1-P1      | 111.75(3) |

**Table S3:** GC-MS data for the nitriles and hydrogenated amines and imines formed during hydrogenation of various nitriles using HP 6890 equipped with flame ionization and thermal conductivity detectors and HP 5973 (MS detector) instruments, equipped with a 30 m column (Restek 5MS, 0.32 mm internal diameter) with a 5% phenylmethylsilicone coating (0.25 mm) and helium as carrier gas with a flow rate of 1 ml/min):

| Entry | Substrate                                                                                                                | Primary amine                                                                                                            | Secondary imine                                                                                                           |
|-------|--------------------------------------------------------------------------------------------------------------------------|--------------------------------------------------------------------------------------------------------------------------|---------------------------------------------------------------------------------------------------------------------------|
| 1     | 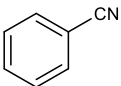<br>$t_r = 6.256$ min<br>$m/z = 103$  | <br>$t_r = 6.885$ min<br>$m/z = 107$  | <br>$t_r = 14.896$ min<br>$m/z = 195$ |
| 2     | <br>$m/z = 133$                       | <br>$t_r = 10.702$<br>$m/z = 136/137$ |                                                                                                                           |
| 3     | <br>$t_r = 10.881$ min<br>$m/z = 133$ | <br>$t_r = 10.334$ min<br>$m/z = 137$ |                                                                                                                           |



|    |                                                                                                                                  |                                                                                                                                  |                                                                                                                                   |
|----|----------------------------------------------------------------------------------------------------------------------------------|----------------------------------------------------------------------------------------------------------------------------------|-----------------------------------------------------------------------------------------------------------------------------------|
| 4  | 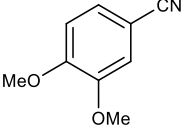<br>$t_r = 12.819 \text{ min}$<br>$m/z = 163$   | <br>$t_r = 12.693 \text{ min}$<br>$m/z = 167$   |                                                                                                                                   |
| 5  | <br>$t_r = 8.454 \text{ min}$<br>$m/z = 114$    | <br>$t_r = 8.660 \text{ min}$<br>$m/z = 121$    |                                                                                                                                   |
| 6  | <br>$t_r = 8.254 \text{ min}$<br>$m/z = 117$    | <br>$t_r = 8.677 \text{ min}$<br>$m/z = 121$    |                                                                                                                                   |
| 7  | <br>$t_r = 5.585 \text{ min}$<br>$m/z = 121$    | <br>$t_r = 7.174 \text{ min}$<br>$m/z = 125$    | <br>$t_r = 14.757 \text{ min}$<br>$m/z = 231$   |
| 8  | <br>$t_r = 6.043 \text{ min}$<br>$m/z = 121$  | <br>$t_r = 7.160 \text{ min}$<br>$m/z = 125$  | <br>$t_r = 14.757 \text{ min}$<br>$m/z = 231$ |
| 9  | <br>$t_r = 9.130 \text{ min}$<br>$m/z = 137$  | <br>$t_r = 10.010 \text{ min}$<br>$m/z = 141$ |                                                                                                                                   |
| 10 | <br>$t_r = 10.261 \text{ min}$<br>$m/z = 182$ | <br>$t_r = 11.015 \text{ min}$<br>$m/z = 186$ | <br>$t_r = 19.093 \text{ min}$<br>$m/z = 353$ |
| 11 | <br>$t_r = 10.104 \text{ min}$<br>$m/z = 181$ | <br>$t_r = 11.127 \text{ min}$<br>$m/z = 185$ | <br>$t_r = 18.902 \text{ min}$<br>$m/z = 353$ |

|    |                                                                                                                                  |                                                                                                                                  |                                                                                                                                 |
|----|----------------------------------------------------------------------------------------------------------------------------------|----------------------------------------------------------------------------------------------------------------------------------|---------------------------------------------------------------------------------------------------------------------------------|
| 12 | 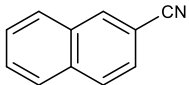<br>$t_r = 13.171 \text{ min}$<br>$m/z = 153$   | <br>$t_r = 13.578 \text{ min}$<br>$m/z = 157$   |                                                                                                                                 |
| 13 | <br>$t_r = 9.147 \text{ min}$<br>$m/z = 104$    | <br>$t_r = 8.614 \text{ min}$<br>$m/z = 108$    |                                                                                                                                 |
| 14 | <br>$t_r = 9.003 \text{ min}$<br>$m/z = 117$    | <br>$t_r = 8.406 \text{ min}$<br>$m/z = 121$    |                                                                                                                                 |
| 15 | <br>$t_r = 10.250 \text{ min}$<br>$m/z = 131$   | <br>$t_r = 9.803 \text{ min}$<br>$m/z = 135$    | <br>$t_r = 17.258 \text{ min}$<br>$m/z = 251$ |
| 16 | <br>$t_r = 13.655 \text{ min}$<br>$m/z = 177$ | <br>$t_r = 13.370 \text{ min}$<br>$m/z = 181$ |                                                                                                                                 |
| 17 | <br>$t_r = 7.577 \text{ min}$<br>$m/z = 97$   | <br>$t_r = 6.713 \text{ min}$<br>$m/z = 101$  |                                                                                                                                 |
| 18 | <br>$t_r = 4.906 \text{ min}$<br>$m/z = 82$   | <br>$t_r = 3.899 \text{ min}$<br>$m/z = 87$   |                                                                                                                                 |
| 19 | <br>$t_r = 6.766 \text{ min}$<br>$m/z = 109$  | <br>$t_r = 6.009 \text{ min}$<br>$m/z = 113$  |                                                                                                                                 |

|    |                                                                                                                      |                                                                                                                      |                                                                                                                       |
|----|----------------------------------------------------------------------------------------------------------------------|----------------------------------------------------------------------------------------------------------------------|-----------------------------------------------------------------------------------------------------------------------|
| 20 | 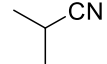<br>$t_r = 2.282$ min<br>$m/z = 69$ | <br>$t_r = 2.057$ min<br>$m/z = 73$ |                                                                                                                       |
| 21 | <br>$t_r = 2.497$ min<br>$m/z = 67$ | <br>$t_r = 2.282$ min<br>$m/z = 73$ | <br>$t_r = 2.733$ min<br>$m/z = 68$ |

$t_r$  = retention time

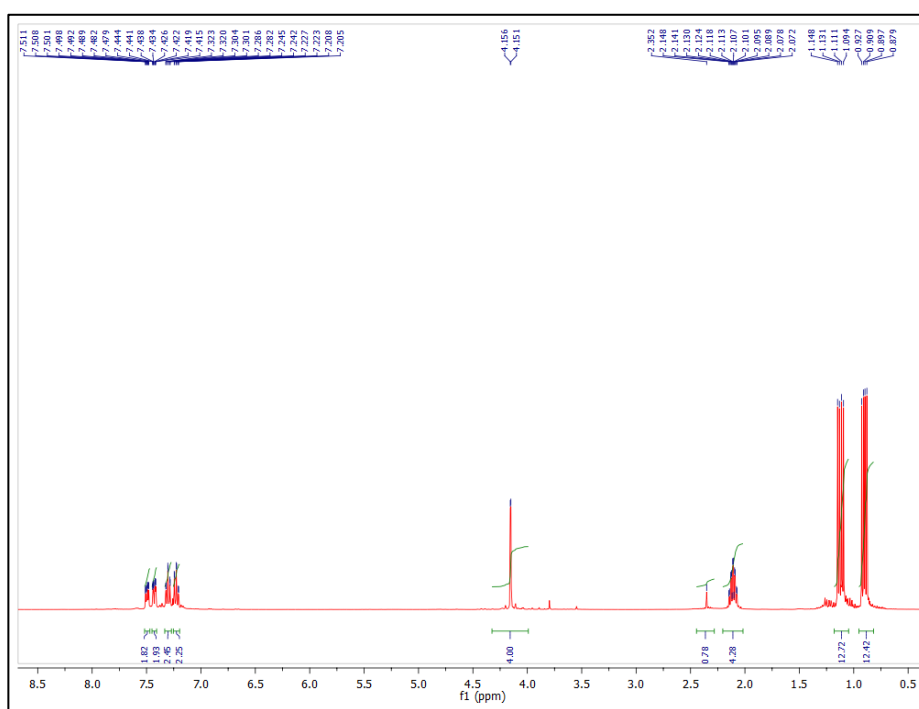

**Figure S1:** <sup>1</sup>H NMR spectrum of **1** in CDCl<sub>3</sub> at room temperature.

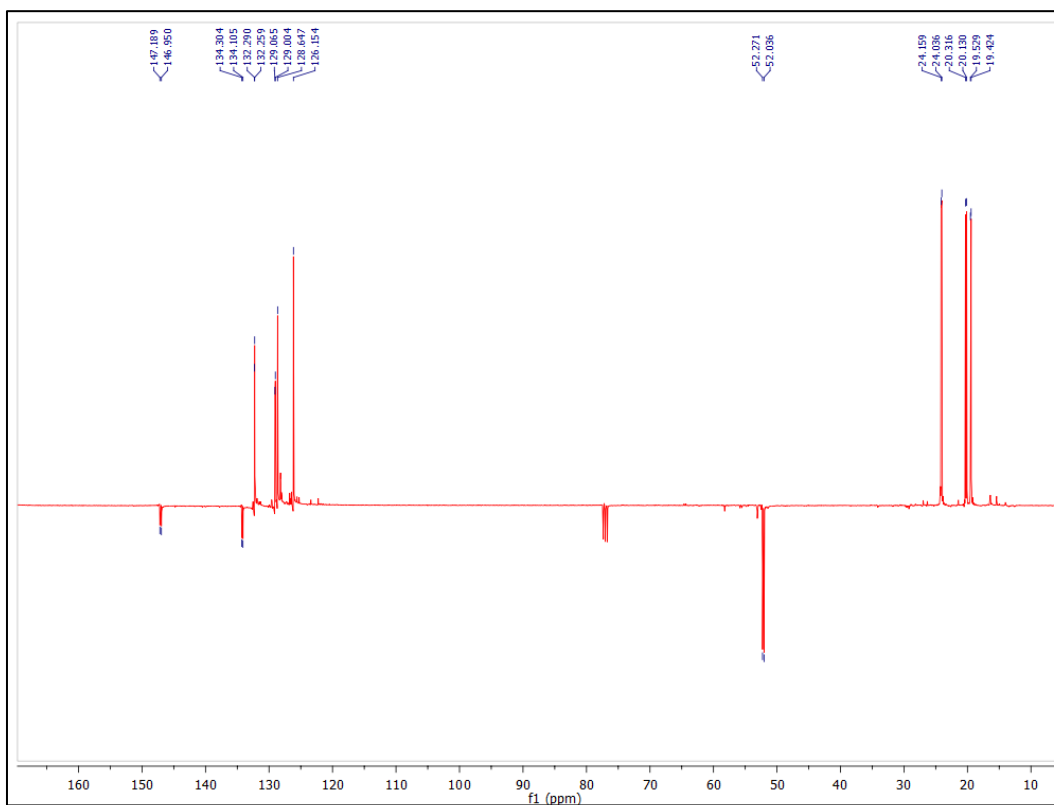

**Figure S2:**  $^{13}\text{CDEPTQ}$  NMR spectrum of **1** in  $\text{CDCl}_3$  at room temperature.

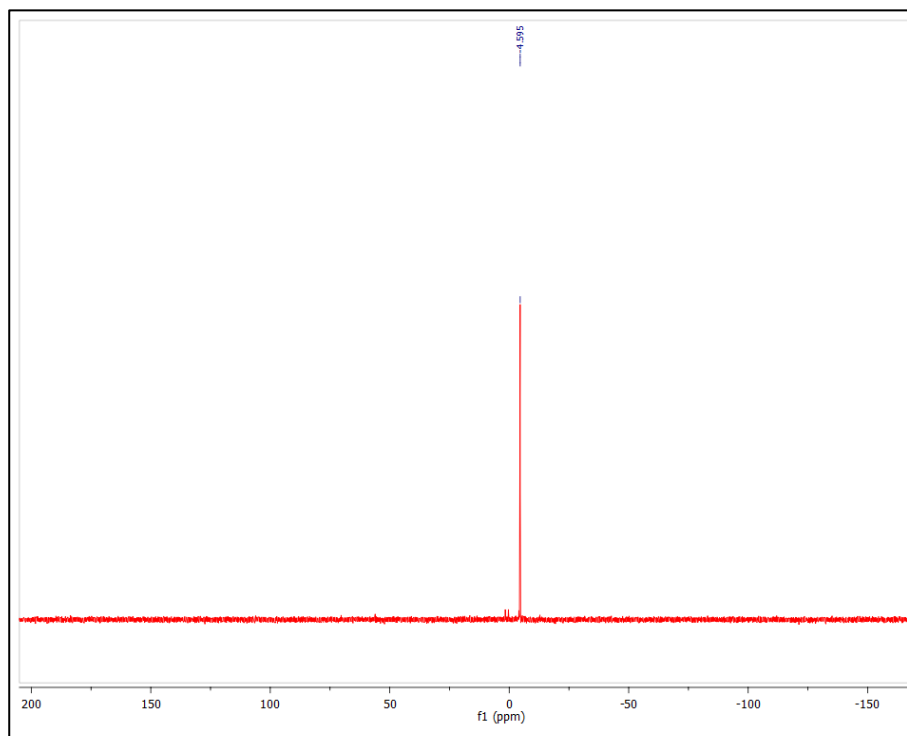

**Figure S3:**  $^{31}\text{P}\{^1\text{H}\}$  NMR spectrum of **1** in  $\text{CDCl}_3$  at room temperature.
